# Pharmacologic EEG Suppression during Cardiopulmonary Bypass: Cerebral Hemodynamic and Metabolic Effects of Thiopental or Isoflurane during Hypothermia and Normothermia

Thomas E. Woodcock, M.B., B.S.,\* John M. Murkin, M.D.,† J. Keith Farrar, Ph.D.,‡ W. Arnold Tweed, M.D.,§ Gerard M. Guiraudon, M.D.,¶ F. Neil McKenzie, M.B., Ch.B.¶

We have determined the effects of thiopental or isoflurane upon cerebral blood flow (CBF) and the cerebral metabolic rate for oxygen (CMRO<sub>2</sub>) when these agents are used in sufficient dose to attain a deep burst suppression pattern on the electroencephalogram (EEG) during hypothermic and normothermic cardiopulmonary bypass (CPB). Thirty-one patients undergoing coronary artery bypass graft surgery were anesthetized with fentanyl 0.1 mg · kg<sup>-1</sup>, and were randomly allocated to one of three groups: control (no further anesthetics during bypass and continuous EEG activity), thiopental treatment (EEG suppression), or isoflurane treatment (EEG suppression). Hypothermia (25–29° C) was routinely induced at onset of nonpulsatile cardiopulmonary bypass. In the treatment groups, thiopental or isoflurane were used during bypass to achieve a deep burst suppression pattern. Cerebral blood flow and cerebral metabolic rate for oxygen were determined during hypothermia and upon rewarming to normothermia (37° C). Pharmacologic EEG suppression with either isoflurane or thiopental was associated with lower cerebral metabolic rate than control values during both hypothermic and normothermic bypass. However, only thiopental-induced EEG suppression was associated with lower cerebral blood flow than control. Cerebral blood flow during isoflurane-induced EEG suppression was similar to control values in spite of the reduced cerebral metabolic rate. (Key words: Anesthesia: cardiovascular. Anesthetics, intravenous: thiopental. Anesthetics, volatile: isoflurane. Brain: blood flow; oxygen consumption. Hypothermia: induced. Monitoring: electroencephalography. Surgery: cardiac.)

IN A RECENT CLINICAL STUDY of the neuropsychiatric sequelae of open heart surgery under normothermic cardiopulmonary bypass (CPB), persistent deficits were found in 7.5% of a control group, while patients subjected to pharmacologic EEG suppression with thiopental during CPB had no persistent deficits.<sup>1</sup> This report provided the first evidence of cerebral protection by a barbiturate in humans, and its efficacy was attributed to the reduction of cerebral metabolic rate for oxygen,

though this was not measured. The mean dose of thiopental required to maintain EEG suppression throughout CPB was 39.5 mg · kg<sup>-1</sup>, and the cost of cerebral protection was myocardial depression necessitating increased frequency of administration of inotropic agents, prolonged anesthesia, prolonged time to extubation, and somnolence for up to 3 days. Though it has been stated that this therapeutic modality is now indicated for patients undergoing open chamber heart surgery,<sup>2</sup> the authors urged that “. . . other drugs equally effective in producing EEG suppression without the hemodynamic consequences and persistence of thiopental should be sought.”<sup>1</sup> Hypothermia is commonly used during CPB to increase the tolerance of the brain to ischemia by reducing the cerebral metabolic rate,<sup>3</sup> and experimental studies have shown that isoflurane, like the barbiturates, reduces cerebral metabolism in a dose-dependent fashion with maximal effect achieved when EEG suppression occurs, and with no direct toxic effect on cerebral metabolic pathways.<sup>4,5</sup> Though isoflurane is not without hemodynamic effects, these are dose-dependent and non-persistent. As a major physiologic determinant of cerebral protection is considered the reversible reduction of cerebral oxygen consumption at the time of reduced oxygen delivery, our study assessed the cerebral hemodynamic and metabolic effects of pharmacologic EEG suppression with thiopental and compared them to those occurring with isoflurane during hypothermic and normothermic CPB.

## Methods

The study was approved by the Institutional Committee on Human Research, and written informed consent to their participation was obtained from patients scheduled for coronary artery bypass graft surgery. Patients with evidence of cerebrovascular disease or valvular heart disease were excluded from this study. Prior to surgery, patients were randomly allocated to control, thiopental, or isoflurane groups.

After premedication with sublingual lorazepam 0.06 mg · kg<sup>-1</sup> and intramuscular morphine sulphate 0.15 mg · kg<sup>-1</sup>, patients were brought to the operating room where ten EEG leads were affixed in a standard parasagittal bipolar block montage. The EEG was moni-

\* Clinical Anaesthesia Fellow.

† Assistant Professor of Anaesthesia.

‡ Associate Professor of Neurosciences.

§ Professor of Anaesthesia.

¶ Professor of Surgery.

Received from the Departments of Anaesthesia, Clinical Neurological Sciences, and Cardiovascular and Thoracic Surgery, University Hospital, University of Western Ontario, London, Ontario. Accepted for publication March 23, 1987. Supported in part by PSI grant 84-41 and U.W.O. Second Century Fund.

Address reprint requests to Dr. Murkin: Department of Anaesthesia, University Hospital, 339 Windermere Road, London, Ontario, Canada, N6A 5A5.

tored and recorded continuously throughout surgery with a sensitivity of 7  $\mu\text{v}$  and a pass band filter of 0.5–70 Hz. A radial arterial cannula and peripheral venous cannula were inserted under local anesthesia. A central venous or pulmonary arterial catheter was introduced *via* the right internal jugular vein, either before induction of anesthesia (under infiltration block) or after induction of anesthesia. The same internal jugular vein was then punctured percutaneously, and a 15 cm 16-Fr catheter was passed in a cephalad direction to the jugular bulb to allow sampling of cerebral venous blood. Routine postoperative radiographs were examined to confirm correct placement of these catheters.

Anesthesia was induced and maintained with fentanyl 0.1  $\text{mg} \cdot \text{kg}^{-1}$ , using succinylcholine or pancuronium bromide to facilitate tracheal intubation. Further doses of pancuronium bromide were used to maintain muscle relaxation. The lungs were ventilated using a Bain non-rebreathing system with a fresh gas flow of 60  $\text{ml} \cdot \text{kg}^{-1} \cdot \text{min}^{-1}$  of oxygen. Ten scintillation counters were positioned around the head, five over each hemisphere, and connected to a Novo Cerebrograph 10a<sup>®</sup> to permit determination of cerebral blood flow (CBF) at five periods during surgery. The first measurements were made following sternotomy prior to cannulation for CPB (pre-CPB), and the last measurements were made following protamine administration after CPB (post-CPB), by intravenous injection of <sup>133</sup>Xe 5–10 mCi in 6 ml 0.9% saline. Expired air was continuously sampled from the endotracheal tube to obtain end-tidal Xenon concentration used subsequently to correct for isotope recirculation.<sup>6</sup> Measurements were also made after 15 and 30 min of hypothermic CPB (cold CPB<sub>15</sub>, cold CPB<sub>30</sub>; temperature 24.9–29° C), and after re-warming during normothermic CPB (warm CPB; temperature 37° C), by injection of the isotope into the arterial port of the pump oxygenator. In preliminary studies, a scintillation detector placed over the aortic inflow cannula during CPB showed less than 1% recirculation of the original xenon bolus; therefore, a correction for recirculation was not applied. Regional cerebral blood flow (rCBF) under each counter was determined by stochastic (height/area) analysis of the <sup>133</sup>Xe washout curve over 15 min.<sup>7,8</sup> The calculated flow values were corrected for changes in the xenon partition coefficient resulting from alterations in hemoglobin concentration and temperature.<sup>9</sup> Mean hemisphere blood flow was calculated from the "hemispheric clearance curve" constructed by summing the outputs of the five detectors on each side.

Blood gas analysis was performed on arterial and jugular venous blood samples at 37° C and corrected to the patients nasopharyngeal temperature by the factors of Kelman and Nunn<sup>10</sup> for determination of oxygen con-

tent according to the formula  $C_x\text{O}_2 = (P_x\text{O}_2 \times s) + (\text{Hb} \times 1.34 \times S_x\text{O}_x)$ , where  $C_x\text{O}_2$  = oxygen content of sample (either arterial or venous),  $P_x\text{O}_2$  = oxygen tension,  $s$  = the solubility coefficient of oxygen in blood adjusted for temperature ( $s = 0.00395 \text{ ml}^{-1} \cdot \text{dl}^{-1} \cdot \text{mmHg}^{-1}$  at 26–28° C,  $0.00317 \text{ ml}^{-1} \cdot \text{dl}^{-1} \cdot \text{mmHg}^{-1}$  at 36–38° C),  $\text{Hb}$  = hemoglobin concentration, and  $S_x\text{O}_2$  = oxygen saturation. The cerebral metabolic rate for oxygen ( $\text{CMRO}_2$ ) was calculated as the product of the mean right hemispheric CBF and the arterio-jugular oxygen content difference. Hemodynamic parameters were recorded during the first 5 min of CBF determination. Cerebral perfusion pressure (CPP) was calculated as the mean arterial pressure – mean jugular venous pressure.

Prior to aortic cannulation patients were given heparin 3–4  $\text{mg} \cdot \text{kg}^{-1}$ , and subsequent doses as necessary to maintain the activated coagulation time (ACT) beyond 400 s. Bypass technique included the use of a membrane oxygenator without arterial line filter and non-pulsatile pump flows of 2–2.5  $\text{l} \cdot \text{m}^{-2} \cdot \text{min}^{-1}$ . The perfusionist attempted to achieve normal arterial pH and  $P_{\text{CO}_2}$  as measured at 37° C without correction for patient temperature.<sup>11,12</sup>

Patients allocated to the control group received no additional anesthetic agents. Patients allocated to thiopental treatment group received intravenous doses of thiopental 8  $\text{mg}/\text{kg}$ <sup>13</sup>, plus further doses sufficient to maintain a predominantly isoelectric burst/suppression EEG pattern during CPB, such that the duration of the isoelectric periods always exceeded the bursts (fig. 1). The first three patients received thiopental throughout CPB to an empirically predetermined maximum of 24  $\text{mg} \cdot \text{kg}^{-1}$ , but, as EEG suppression for the full period of CPB could not be consistently maintained within this total dose limit, further patients received thiopental only for the first 15 min of hypothermic CPB (cold CPB<sub>15</sub>) and upon re-warming to normothermia (warm CPB). In these patients, continuous EEG activity was allowed to resume in the interval between measurement periods cold CPB<sub>15</sub> and warm CPB, and no measurement was attempted at cold CPB<sub>30</sub>. Patients allocated to isoflurane treatment group received isoflurane, in air and oxygen, *via* the pump oxygenator in sufficient concentration (read from the vapouriser dial setting) to attain a predominantly isoelectric burst suppression EEG pattern (fig. 1).

Mean arterial pressure during CPB was kept above 40 mmHg by administration of phenylephrine as required. Hypertension (pressure greater than 90 mmHg) was treated with chlorpromazine (maximum dose 25 mg) or sodium nitroprusside. Immediately before termination of CPB, 0.5–1.0 g calcium chloride was injected *via* the pump for all patients. After termination of CPB, fluids and inotropes were used as necessary to achieve satisfac-

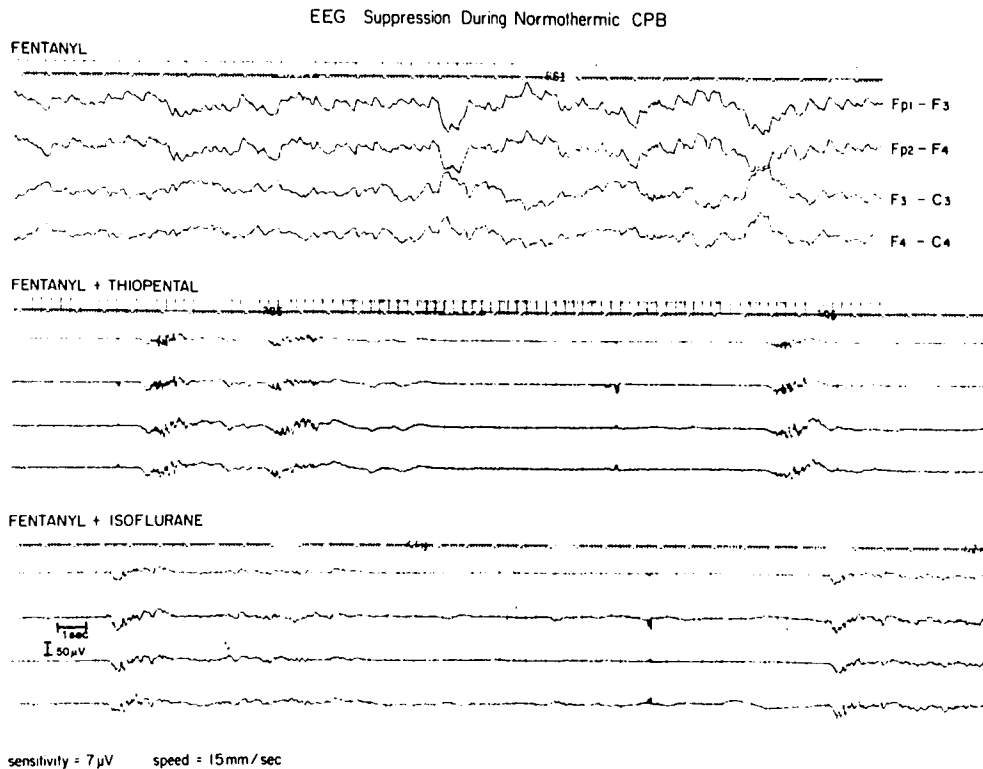

FIG. 1. Representative EEG tracings from three study group patients during normothermic cardiopulmonary bypass. The top tracing is from the control group, and demonstrates characteristic low-voltage activity occurring during high-dose narcotic anesthesia. The middle tracing shows burst suppression in a patient receiving thiopental, while the bottom tracing demonstrates burst suppression resulting from isoflurane administration.

tory hemodynamic parameters. Protamine was administered in sufficient dosage to restore the ACT to pre-CPB values.

Data were submitted to one-way analysis of variance (ANOVA), and Scheffes test for multiple comparisons was used to identify differences when ANOVA was significant to  $P < 0.05$ . For nonparametric data, chi-square testing using Bonferroni's correction for multiple comparisons, with  $P < 0.05/k$ , was used to determine significance.

### Results

As shown in table 1, there were no significant differences in demographics between groups. Subjects were predominantly male, and the age range was 45–73 yr.

Routine postoperative radiography showed no malposition of the jugular catheters. Nasopharyngeal tem-

perature, arterial carbon dioxide tension, hemoglobin concentration, cerebral perfusion pressure, and mean arterial pressure in each group at each stage of the study are shown in table 2. One hundred and twenty-six acceptable CBF measurements were made in 31 patients (table 2). There were no significant variations in rCBF and intrahemispheric CBF values were comparable. Right hemispheric CBF was utilized for determination of CMRO<sub>2</sub> to conform with the side of the jugular bulb catheter.

Compared to either the thiopental group or the control group, phenylephrine was required significantly more often ( $P < 0.0005$ ) when isoflurane was used to suppress the EEG, whereas administration of vasodilators was required more frequently ( $P < 0.0005$ ) in the control group *versus* the other groups.

Continuous low frequency EEG activity was recorded throughout CPB in control group patients (fig. 1). During hypothermic CPB (temperature range 24.9–29° C), 1.1 ± 0.3% isoflurane produced EEG burst suppression, and, during normothermic CPB (temperature range 36.5–38.1° C), 2.4 ± 0.4% isoflurane was required to maintain EEG burst suppression. In the thiopental group, the mean total dose of barbiturate needed to achieve 30–40 min EEG burst suppression was 17 ± 4 mg/kg.

There were no significant differences in pre-CPB values of CBF and CMRO<sub>2</sub> (tables 3, 4; figs. 2, 3) EEG

TABLE 1. Patient Demographics

|                       | Control     | Thiopental  | Isoflurane  |
|-----------------------|-------------|-------------|-------------|
| Sex M/F (n)           | 10/2        | 6/1         | 11/1        |
| Age (yr)              | 50.0 ± 8.1  | 63.1 ± 6.5  | 55.5 ± 9.9  |
| Weight (kg)           | 83.5 ± 11.8 | 78.1 ± 11.2 | 79.4 ± 10.2 |
| Duration of CPB (min) | 106 ± 37    | 105 ± 21    | 104 ± 26    |

Results are mean ± SD. Results N.S. at  $P < 0.05$ . CPB = cardiopulmonary bypass.

TABLE 2. Intraoperative Variables

|                                       | Pre-CPB     | Cold CPB <sub>15</sub> | Cold CPB <sub>30</sub> | Warm CPB   | Post-CPB   |
|---------------------------------------|-------------|------------------------|------------------------|------------|------------|
| Data Measurements (n)                 |             |                        |                        |            |            |
| Control                               | 11          | 11                     | 6                      | 11         | 10         |
| Thiopental                            | 7           | 7                      | 2                      | 7          | 6          |
| Isoflurane                            | 10          | 11                     | 8                      | 9          | 10         |
| Temperature (°C)                      |             |                        |                        |            |            |
| Control                               | 35.5 ± 0.6  | 26.8 ± 1.0             | 26.8 ± 1.2             | 37.1 ± 0.4 | 35.8 ± 0.3 |
| Thiopental                            | 35.0 ± 0.6  | 26.5 ± 1.4             | (25.0, 25.2)           | 37.1 ± 0.3 | 35.8 ± 0.3 |
| Isoflurane                            | 35.7 ± 0.3  | 26.6 ± 0.9             | 28.3 ± 0.6†            | 37.3 ± 0.5 | 35.6 ± 0.6 |
| P <sub>a</sub> CO <sub>2</sub> (mmHg) |             |                        |                        |            |            |
| Control                               | 36 ± 5      | 41 ± 3                 | 37 ± 3                 | 34 ± 5     | 37 ± 3     |
| Thiopental                            | 35 ± 1      | 42 ± 1                 | (26, 44)               | 32 ± 6     | 37 ± 3     |
| Isoflurane                            | 36 ± 2      | 42 ± 4                 | 42 ± 8                 | 36 ± 2     | 37 ± 3     |
| MAP (mmHg)                            |             |                        |                        |            |            |
| Control                               | 95 ± 11     | 72 ± 14                | 83 ± 5                 | 60 ± 13    | 77 ± 13    |
| Thiopental                            | 91 ± 13     | 54 ± 12*               | (61, 61)               | 58 ± 10    | 74 ± 2     |
| Isoflurane                            | 89 ± 13     | 52 ± 8*                | 59 ± 10*               | 52 ± 4     | 73 ± 7     |
| CPP (mmHg)                            |             |                        |                        |            |            |
| Control                               | 84 ± 16     | 66 ± 19                | 74 ± 8                 | 52 ± 12    | 67 ± 12    |
| Thiopental                            | 81 ± 13     | 44 ± 12*               | 50 ± 5                 | 48 ± 11    | 61 ± 5     |
| Isoflurane                            | 75 ± 11     | 40 ± 9*                | 50 ± 11                | 38 ± 3*    | 58 ± 7     |
| Hb (mg/dl)                            |             |                        |                        |            |            |
| Control                               | 12.3 ± 0.86 | 8.6 ± 1.0              | 8.5 ± 0.7              | 8.4 ± 1.1  | 9.1 ± 1.0  |
| Thiopental                            | 11.8 ± 1.4  | 7.6 ± 1.0              | (7.2, 6.9)             | 7.7 ± 0.9  | 8.4 ± 0.9  |
| Isoflurane                            | 12.4 ± 0.9  | 8.4 ± 1.0              | 8.5 ± 0.7              | 8.4 ± 0.5  | 8.4 ± 0.4  |

P<sub>a</sub>CO<sub>2</sub> at 37°C; MAP = mean arterial pressure; CPP = cerebral perfusion pressure; Hb = hemoglobin concentration; CBF = cerebral

blood flow; CPB = cardiopulmonary bypass. Results are mean ± SD. \* *P* < 0.05 vs. control; † *P* < 0.05 vs. thiopental.

suppression with thiopental during hypothermic CPB (cold CPB<sub>15</sub>) was associated with significantly lower CBF and CMRO<sub>2</sub> than control. Only two CBF measurements were obtained at cold CPB<sub>30</sub> in the thiopental group, and these data points are presented in table 3, but were not subjected to statistical analysis. Thiopental-induced EEG suppression was also associated with significantly lower CBF and CMRO<sub>2</sub> than control during warm CPB.

Pharmacologic EEG suppression with isoflurane was associated with a significantly lower CMRO<sub>2</sub> than control at each stage of CPB. One patient in the isoflurane group had elevated CBF before CPB (48 ml · 100 g<sup>-1</sup> · min<sup>-1</sup>) and during CPB (27 ml · 100 g<sup>-1</sup> · min<sup>-1</sup> at cold CPB<sub>15</sub>; 24 ml · 100 g<sup>-1</sup> · min<sup>-1</sup> at cold CPB<sub>30</sub>) with similar CMRO<sub>2</sub> to the other patients in the group, and so was considered an outlier; the values are excluded from statistical analysis. CBF during isoflurane-induced EEG suppression at cold CPB<sub>15</sub> was intermediate between control and thiopental groups, but was not statis-

tically different from either. At cold CPB<sub>30</sub> CBF during isoflurane-induced EEG suppression was again somewhat lower than control, but did not reach statistical significance. During warm CPB, CBF during isoflurane-induced EEG suppression was similar to control and greater than thiopental.

Post-CPB measurements were made 15–30 min after termination of CPB, and in EEG suppression groups, after discontinuation of the agent used with return to continuous EEG activity. CBF and CMRO<sub>2</sub> values after CPB were similar in all three groups.

In the early post-bypass period, ephedrine or an infusion of inotropic agents were used to increase cardiac contractility in 2/12 control patients, 2/7 patients who had been treated with thiopental, and 2/12 patients who had been treated with isoflurane. A further two patients in the control group and two patients who had received thiopental required mechanical assist devices for left ventricular failure attributable to perioperative myocardial ischemia.

TABLE 3. Cerebral Blood Flow (ml · 100 g<sup>-1</sup> · min<sup>-1</sup>)

|            | Pre-CPB    | Cold CPB <sub>15</sub> | Cold CPB <sub>30</sub> | Warm CPB    | Post-CPB   |
|------------|------------|------------------------|------------------------|-------------|------------|
| Control    | 26.9 ± 5.6 | 14.6 ± 5.5             | 12.8 ± 4.1             | 19.5 ± 4.8  | 25.4 ± 6.0 |
| Thiopental | 32.4 ± 6.7 | 8.2 ± 2.5*             | (7.2, 12.1)            | 14.9 ± 1.0† | 21.8 ± 3.7 |
| Isoflurane | 24.6 ± 5.8 | 11.8 ± 2.5             | 9.2 ± 1.5              | 19.6 ± 4.7  | 24.8 ± 3.6 |

CPB = cardiopulmonary bypass. Results are mean ± SD.

\* *P* < 0.05 vs. control; † *P* < 0.05 vs. other groups.

TABLE 4. Cerebral Metabolic Rate for Oxygen ( $\text{ml} \cdot 100 \text{g}^{-1} \cdot \text{min}^{-1}$ )

|            | Pre-CPB     | Cold CPB <sub>15</sub> | Cold CPB <sub>30</sub> | Warm CPB     | Post-CPB    |
|------------|-------------|------------------------|------------------------|--------------|-------------|
| Control    | 1.80 ± 0.32 | 0.41 ± 0.08            | 0.48 ± 0.11            | 1.16 ± 0.21  | 1.38 ± 0.37 |
| Thiopental | 2.36 ± 0.48 | 0.27 ± 0.02*           | (0.23, 0.37)           | 0.92 ± 0.14* | 1.33 ± 0.13 |
| Isoflurane | 1.78 ± 0.41 | 0.29 ± 0.04*           | 0.30 ± 0.06*           | 0.76 ± 0.16* | 1.17 ± 0.24 |

CPB = cardiopulmonary bypass. Results are mean ± SD.

\*  $P < 0.05$  vs. control.

## Discussion

This is the first report of the cerebral metabolic and hemodynamic effects of thiopental or isoflurane-induced EEG suppression during CPB in humans.

The CBF measurement techniques used in the present study (intravenous and intra-aortic injections) will both yield a slight underestimate of "true" CBF due to the presence of Xenon in the extracerebral (scalp) tissues. Estimates of grey matter blood flow obtained by bicompartamental analysis are not significantly affected by this extracerebral contamination,<sup>14</sup> but estimates of white matter and weighted mean blood flows are underestimated by 10–15%.<sup>8</sup>

The use of noncompartmental stochastic analysis (height/area) for calculating mean CBF is less sensitive to this contamination, and integration to 15 min rather than infinity further reduces the effect of the extracerebral compartment. The stochastic method produces estimates of mean CBF which are within 2–5% of the "true" mean flow over a wide range of flow rates.<sup>8</sup>

For determination of  $\text{CMRO}_2$ , sampling of effluent cerebral venous blood from a jugular bulb catheter is representative of the venous drainage from all brain structures due to mixing in the confluence of the venous sinuses.<sup>15</sup> Although there is some drainage of extracerebral tissue *via* the cortical emissary veins,

blood sampled from the jugular bulb is contaminated to less than 3% by extracerebral flow.<sup>16</sup>

Patients undergoing CPB for closed heart surgery were selected as subjects for this study, as they are less at risk of cerebral embolism<sup>17</sup> which might cause pathologic derangements of CBF, complicating the interpretation of the data. The radioxenon washout technique has previously been used to measure CBF in humans during cardiac surgery in an attempt to elucidate the effects of cardiopulmonary bypass on the cerebral circulation,<sup>18–21</sup> and postoperatively to ascertain the incidence of diffuse cerebral injury.<sup>22,23</sup>

Many factors influence CBF and  $\text{CMRO}_2$ , and it has been reported that CBF is independent of mean arterial pressure over the range 30–110 mmHg using the described bypass technique, implying that cerebral autoregulation is maintained.<sup>18,19</sup> The ventilation parameters used in this study produced mild hypocapnia before and after CPB. Our intention during CPB was to achieve normocapnia on arterial blood gas analysis measured at 37° C and uncorrected for patient temperature,<sup>11,12</sup> and values achieved were comparable between groups at each period (table 2).

The profile of intraoperative CBF and  $\text{CMRO}_2$  changes seen in the control group for this study is similar to that previously reported from this unit, in which the anesthetic technique varied primarily in the premedication used.<sup>18</sup> The Pre-CPB CBF and  $\text{CMRO}_2$  values are lower than normal values for the awake patient, and are attributable to anesthesia, mild hypothermia, and hypocapnia (table 2). The Pre-CPB CBF values are comparable to those obtained by Henriksen *et al.*<sup>21</sup> using the Initial Slope Index method following intra-arterial injection of radio-Xenon. Govier *et al.*<sup>19</sup> and Prough *et al.*<sup>20</sup> measured CBF in humans during hypothermic CPB and found low values comparable to the control group presented here. Both this and our previous study have documented the low  $\text{CMRO}_2$  attained during hypothermic CPB in humans, and we postulate that CBF/ $\text{CMRO}_2$  coupling is responsible for the low CBF.<sup>18</sup> By contrast, Henriksen *et al.*<sup>21</sup> reported cerebral hyperperfusion during hypothermic CPB, but their bypass technique included the addition of  $\text{CO}_2$  to maintain normal temperature-corrected arterial  $\text{P}_{\text{CO}_2}$  values. The effects of acid/base management on CBF and  $\text{CMRO}_2$  during hypothermic CPB are discussed by us elsewhere.<sup>18</sup>

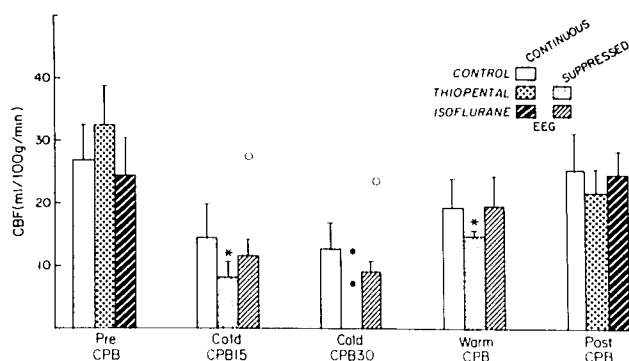

FIG. 2. CBF values in control, thiopental, and isoflurane groups; see text for discussion. Values are mean + SD. ○ = outlying result excluded from statistical analysis (patient in isoflurane group); ● = individual values for CBF in thiopental group at CPB<sub>30</sub> (n = 2); CBF = cerebral blood flow; CPB = cardiopulmonary bypass. \* $P < 0.05$  versus control.

EEG suppression was achieved in all patients treated with either thiopental or isoflurane. The initial dose of thiopental ( $8 \text{ mg} \cdot \text{kg}^{-1}$ ) was determined from a report by Quasha *et al.* noting its efficacy in inducing prolonged burst suppression during hypothermic CPB.<sup>13</sup> Isoflurane has similarly been shown to be an effective EEG suppressant during hypothermic CPB by Loomis *et al.*<sup>24</sup> They reported onset of burst suppression at a higher average isoflurane vaporizer setting (2.2%), which, exclusive of vaporizer performance, may partly reflect the lower dosage of narcotic their patients had received (average fentanyl  $0.07 \text{ mg} \cdot \text{kg}^{-1}$ ). In addition, their primary end-point was reduction of MAP rather than induction of EEG burst suppression. We have reported isoflurane-induced EEG suppression during non-cardiac surgery occurring at vaporizer settings similar to those required during normothermic CPB.<sup>25</sup>

CMRO<sub>2</sub> at burst/suppression was similar with either agent during hypothermia (approximately  $0.3 \text{ ml} \cdot 100 \text{ g}^{-1} \cdot \text{min}^{-1}$  at  $28^\circ \text{C}$ ), and presumably reflects the basal cerebral oxygen consumption at those temperatures. The proportionate reduction in CMRO<sub>2</sub> achieved by pharmacologic EEG suppression from the anesthetized, continuous-EEG control state at either temperature was of the order of 30%, and is in good agreement with the findings of Astrup *et al.* who used pentobarbital or lidocaine to induce EEG suppression in a canine laboratory model of hypothermic and normothermic CPB.<sup>26</sup> Our results also support the hypothesis of Steen *et al.*<sup>27</sup> that thiopental only reduces CMRO<sub>2</sub> during CPB by reducing functional electrical activity, and is only additive with hypothermia in the presence of EEG activity. For example, it is evident from our data that hypothermia to  $26\text{--}30^\circ \text{C}$ , which does not extinguish EEG activity, provides more cerebral metabolic depression than does pharmacologic EEG suppression at  $37^\circ \text{C}$  (table 4). We are not aware of any laboratory studies of isoflurane effect on cerebral metabolism during hypothermic CPB, but Newberg *et al.* have demonstrated that isoflurane, like thiopental, only reduces CMRO<sub>2</sub> by reducing functional cerebral activity, and that no further reduction in CMRO<sub>2</sub> occurs when the EEG becomes isoelectric.<sup>4</sup>

In the thiopental group, CBF was reduced in conjunction with CMRO<sub>2</sub>. Reductions in CBF would be expected to produce a proportionate reduction in the delivery of emboli to the cerebral circulation. The cerebroprotective effects of thiopental reported by Nussmeier *et al.*<sup>1</sup> may, therefore, be primarily due to cerebral vasoconstriction rather than a primary reduction in CMRO<sub>2</sub>. A reduction of CBF was not achieved in the isoflurane group. There was a tendency to lower CBF associated with isoflurane-induced EEG suppression during hypothermic CPB, but it did not attain sta-

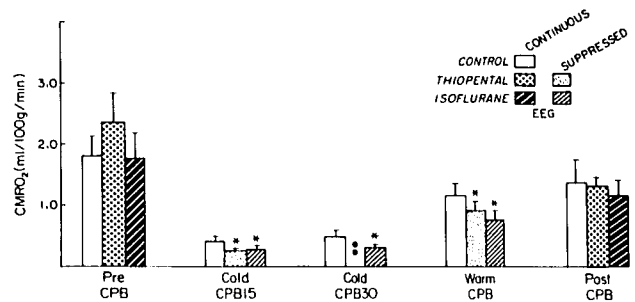

FIG. 3. CMRO<sub>2</sub> values in control, isoflurane, and thiopental groups; see text for discussion. Values are mean + SD. ● = individual values for CMRO<sub>2</sub> in thiopental group at CPB<sub>30</sub>; CMRO<sub>2</sub> = cerebral metabolic rate for oxygen; CPB = cardiopulmonary bypass. \*P < 0.05 versus control.

tistical significance in this study. A biphasic effect of isoflurane on CBF has been noted in baboons; at less than 1 MAC isoflurane, CBF is reduced in conjunction with CMRO<sub>2</sub>, but, at greater than 1 MAC isoflurane, cerebral vasodilatation occurs and CBF returns to baseline levels, despite further reduction in CMRO<sub>2</sub>.<sup>28</sup> This uncoupling of the CBF/CMRO<sub>2</sub> relationship has been documented in humans during isoflurane-induced hypotension<sup>29</sup> and isoflurane-induced EEG suppression.<sup>25</sup> There may, therefore, be a real reduction of CBF during EEG suppression with 1% isoflurane during hypothermic CPB which, because of sample size, this study has failed to confirm statistically. EEG suppression with 2.5–3.5% isoflurane during normothermic CPB is undoubtedly associated with a degree of cerebral hyperfusion relative to the reduced CMRO<sub>2</sub>. One possible mechanism for this vasodilatation is an increase in brain cyclic-AMP.<sup>30</sup>

A potentially limiting side effect of barbiturate-induced EEG suppression is known to be persistent depression of myocardial contractility. Upon reviewing our preliminary results, we found that three of 22 patients studied up to that point had evidence of severe ischemic left ventricular failure after CPB. Two of them had received thiopental. Though there was no evidence that thiopental was responsible for myocardial ischemia, we were concerned that the barbiturate might reduce the response to inotropic drugs, and felt that we were not justified in continuing to use thiopental in association with our high-dose fentanyl anesthetic technique for patients with ischemic heart disease, as they are not the primary risk group for embolic cerebral complications. At completion of our study, one further patient (in the control group) had sustained severe ischemic left ventricular failure.

In summary, we have demonstrated that EEG suppression with thiopental during CPB in humans reduces both CBF and CMRO<sub>2</sub>. Isoflurane is also effective in inducing EEG suppression and reducing CMRO<sub>2</sub> dur-

ing CPB, although it does not reduce CBF during normothermic CPB when high concentrations are required to maintain EEG suppression. These differences in effect on CBF may be important in considerations of potential cerebral protection against cerebral emboli global or focal ischemia associated with cardiopulmonary bypass. Hypothermia is a potent metabolic depressant and, in the presence of EEG activity, its effects can be augmented by pharmacologic EEG suppression. Clinical outcome studies are indicated to assess the relative benefits of hypothermia and pharmacologic EEG suppression in patients undergoing open or closed heart surgery during CPB.

The excellent technical support of perfusionists J. McDonald, C.C.P., and A. Cleland, C.P., secretarial assistance of C. Toth, and cooperation of cardiac anesthesiologists F. J. Penny, M.D., G. G. Rossouw, M.D., D. C. Chung, M.D., and J. L. Kutt, M.D., and the cardiac surgical nurses is gratefully acknowledged.

### References

- Nussmeier NA, Arlund C, Slogoff S: Neuropsychiatric complications after cardiopulmonary bypass: Cerebral protection by a barbiturate. *ANESTHESIOLOGY* 64:165-170, 1986
- Michenfelder JD: A valid demonstration of barbiturate-induced brain protection in man—At last. *ANESTHESIOLOGY* 64:140-142, 1986
- White FN: A comparative physiological approach to hypothermia. *J Thorac Cardiovasc Surg* 82:821-831, 1981
- Newberg LA, Milde JH, Michenfelder JD: The cerebral metabolic effects of isoflurane at and above concentrations that suppress cortical electrical activity. *ANESTHESIOLOGY* 59:23-28, 1983
- Newberg LA, Michenfelder JD: Cerebral protection by isoflurane during hypoxemia or ischemia. *ANESTHESIOLOGY* 59:29-35, 1983
- Obrist WD, Thompson HK, Wang HS, Wilkinson WE: Regional cerebral blood flow estimation by  $^{133}\text{Xe}$  inhalation. *Stroke* 6:245-256, 1975
- Hoedt-Rasmussen K, Sveinsdotter E, Lassen NA: Regional cerebral blood flow in man determined by intra-arterial injection of radioactive inert gas. *Circ Res* 18:237-247, 1966
- Obrist WD, Wilkinson WE: Stability and sensitivity of CBF indices in the non invasive  $^{133}\text{Xe}$  method. *Cerebral Blood Flow and Metabolism Measurement*. Edited by Hartman A, Hoyer S. New York, Springer Verlag, pp 30-36, 1985
- Chen RYZ, Fan FC, Kim S, Jan KM, Usami S, Chien S: Tissue-blood partition coefficient for xenon: Temperature and hematocrit dependence. *J Appl Physiol* 49:178-183, 1980
- Kelman GR, Nunn JF: Nomograms for correction of blood  $\text{P}_{\text{O}_2}$ ,  $\text{P}_{\text{CO}_2}$ , pH and base excess for time and temperature. *J Appl Physiol* 21:1484, 1966
- Ream AK, Reitz BA, Silverberg G: Temperature correction of  $\text{P}_{\text{CO}_2}$  and pH in estimating acid-base status: An example of the Emperors new clothes? *ANESTHESIOLOGY* 56:41-44, 1982
- Williams JJ, Marshall BE: A fresh look at an old question. *ANESTHESIOLOGY* 56:1-2, 1982
- Quasha AL, Tinker JH, Sharbrough FW: Hypothermia plus thiopental: Prolonged electroencephalographic suppression. *ANESTHESIOLOGY* 55:636-640, 1981
- Thomas DJ, Zilkha LS, Redmond S, DuBoulay GH, Marshall J, Russell RWR, Symon L: An intravenous  $^{133}\text{Xe}$  clearance technique for measuring cerebral blood flow. *J Neurol Sci* 40:53-63, 1979
- Kety SS, Schmidt CF: The nitrous oxide method for the quantitative determination of cerebral blood flow in man: Theory, procedure and normal values. *J Clin Invest* 27:476-483, 1947
- Schenkin HA, Harmel MH, Kety SS: Dynamic anatomy of the cerebral circulation. *Arch Neurol Psychiat* 60:240-252, 1948
- Slogoff S, Girgis KZ, Keats AS: Etiologic factors in neuropsychiatric complications associated with cardiopulmonary bypass. *Anesth Analg* 61:903-911, 1982
- Murkin JM, Farrar JK, Tweed AW, Guiraudon GM, McKenzie FN: Cerebral autoregulation and flow/metabolism coupling during hypothermic cardiopulmonary bypass: The influence of  $\text{Pa}_{\text{CO}_2}$ . *Anesth Analg*, in press, 1987
- Govier AV, Reves JG, McKay RD, Karp RB, Zorn GL, Morawetz RZ, Smith LR, Adams M, Freeman AM: Factors and their influence on regional cerebral blood flow during nonpulsatile cardiopulmonary bypass. *Ann Thorac Surg* 38:592-600, 1984
- Prough DS, Stump DA, Roy RC, Gravlee GP, Williams T, Mills SA, Hinshelwood L, Howard G: Response of cerebral blood flow to changes in carbon dioxide tension during hypothermic cardiopulmonary bypass. *ANESTHESIOLOGY* 64:576-581, 1986
- Henriksen L, Hjelms E, Lindeburgh T: Brain hyperperfusion during open heart surgery. Cerebral blood flow measured in man by intra-arterial injection of  $^{133}\text{Xe}$ : Evidence suggestive of intraoperative microembolization. *J Thorac Cardiovasc Surg* 86:202-208, 1983
- Smith PLC, Treasure T, Newman SP, Joseph P, Ell PJ, Schneidau A, Harrison MJG: Cerebral consequences of cardiopulmonary bypass. *Lancet* 1:823-825, 1986
- Henriksen L: Evidence suggestive of diffuse brain damage following cardiac operations. *Lancet* 1:816-820, 1984
- Loomis CW, Brunet D, Milne B, Cervenka FW, Johnson GD: Arterial isoflurane concentration and EEG burst suppression during cardiopulmonary bypass. *Clin Pharmacol Ther* 40:304-313, 1986
- Murkin JM, Farrar JK, Tweed WA, Guiraudon GM: Cerebral blood flow, oxygen consumption and EEG during isoflurane anesthesia. *Anesth Analg* 65:S107, 1986
- Astrup J, Sørensen PM, Sørensen HR: Inhibition of cerebral oxygen and glucose consumption in the dog by hypothermia, pentobarbital and lidocaine. *ANESTHESIOLOGY* 55:263-268, 1981
- Steen PA, Newberg L, Milde JH, Michenfelder JD: Hypothermia and barbiturates: Individual and combined effects on canine cerebral oxygen consumption. *ANESTHESIOLOGY* 58:527-532, 1983
- Van Aken H, Fitch W, Graham DI, Brussel T, Themann H: Cardiovascular and cerebrovascular effects of isoflurane-induced hypotension in the baboon. *Anesth Analg* 65:565-574, 1986
- Newman B, Gelb AW, Lam AM: The effect of isoflurane-induced hypotension on cerebral blood flow and cerebral metabolic rate for oxygen in humans. *ANESTHESIOLOGY* 64:307-310, 1986
- MacMurdo SD, Nemoto EM, Nikki P, Frankenberg MJ: Brain cyclic-AMP and possible mechanisms of cerebrovascular dilation by anesthetics in rats. *ANESTHESIOLOGY* 55:435-438, 1981
